# Supplementary material for: Low-temperature conversion of CaO-captured CO2 to CH4 over a greenly prepared Ni/CaO/Al2O3 composite under static pressure conditions
Source: Royal Society of Chemistry journal article supplement (doi:10.1039/d3re00255a), 2023-01-01
Supplement: d3re00255a1.pdf [file d3re00255a1.pdf]

# Supporting Information

## **Low-temperature conversion of the CaO-Captured CO<sub>2</sub> to CH<sub>4</sub> over the greenly prepared Ni/CaO/Al<sub>2</sub>O<sub>3</sub> composite under static pressure conditions**

Han-Qing Chen, Zhan-Kuo Guo, Shu-Xiang Xiang, Hui-Lin Jiang, and Yun-Lei Teng\*

*School of Chemistry and Chemical Engineering, Yangzhou University, Yangzhou, 225002, P.R. China.*

*\*Corresponding authors*

*Yun-Lei Teng*

*E-mail Address: ylteng@yzu.edu.cn;*

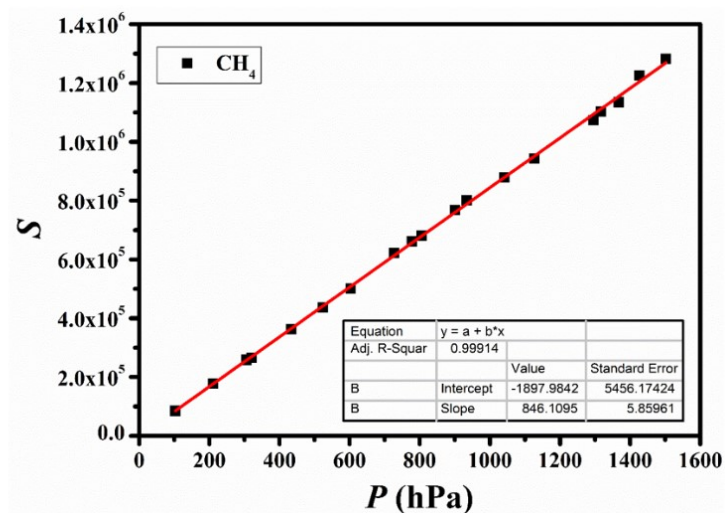

**Fig. S1.** The pressure-peak area standard curve of high-purity methane in the TCD channel of a gas chromatograph at room temperature.

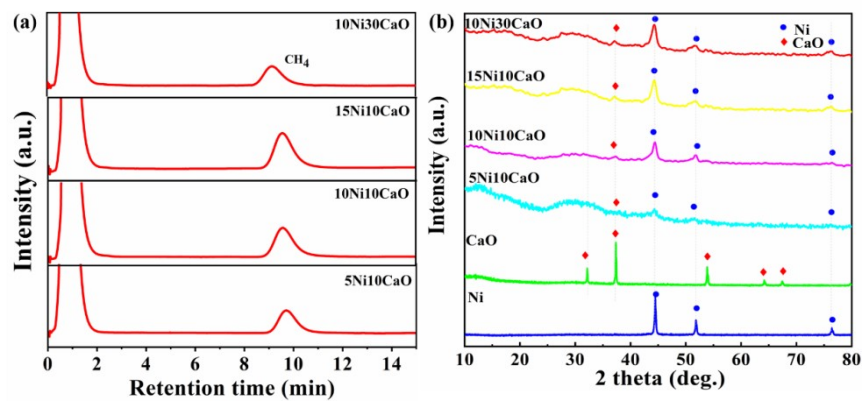

**Fig. S2.** GC curve of gas product (a) and (b) XRD spectrum of composites prepared by high-speed mechanical ball milling reaction.

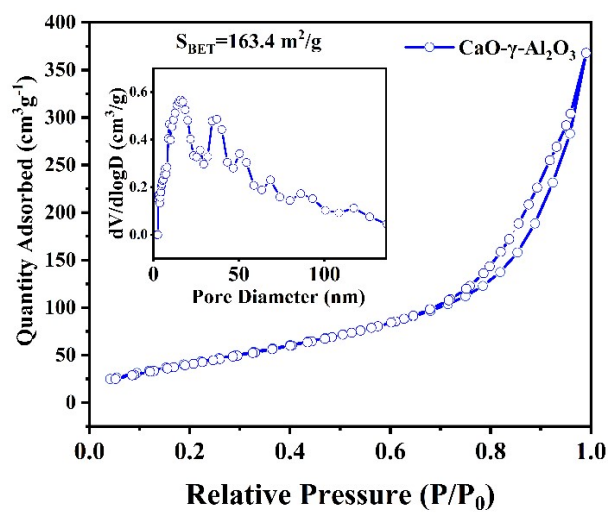

**Fig. S3.** N<sub>2</sub> adsorption-desorption curve and pore size distribution diagram (inset) of the CaO/ $\gamma$ -Al<sub>2</sub>O<sub>3</sub> composite.

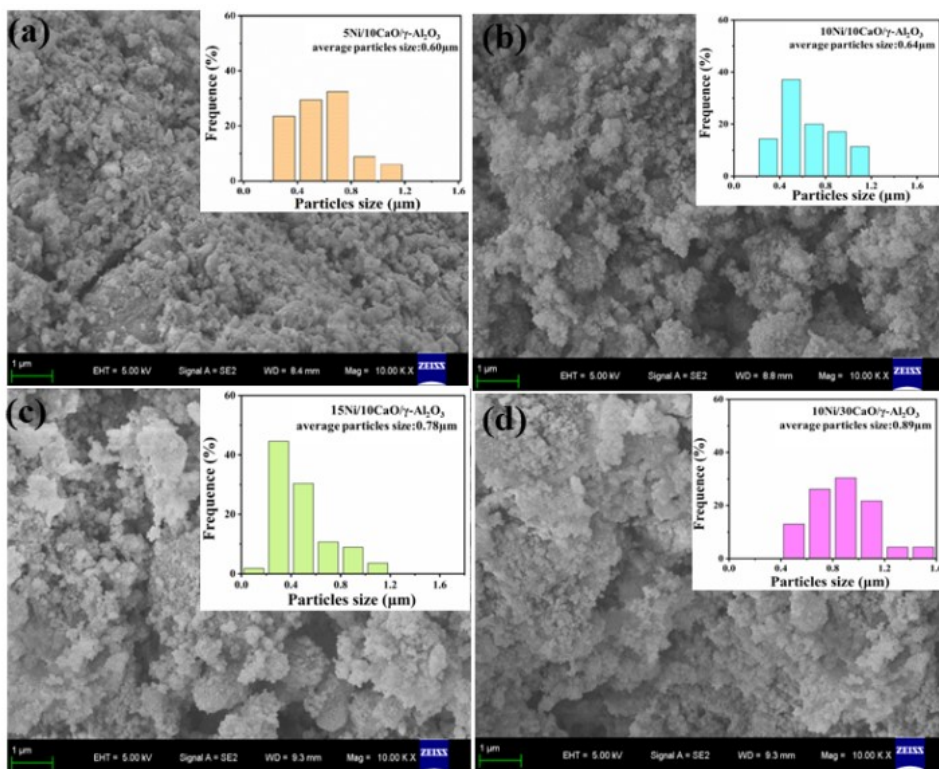

**Fig. S4.** SEM images of Ni/CaO/ $\gamma$ -Al<sub>2</sub>O<sub>3</sub> after CO<sub>2</sub> capture and hydromethanation at 350 °C.
